# Supplementary material for: Clinical Outcomes of Individuals with COVID-19 and Tuberculosis during the Pre-Vaccination Period of the Pandemic: A Systematic Review
Source: MDPI journal article supplement (doi:10.3390/jcm11195656), 2022-09-26
Supplement: s1 [file s1]

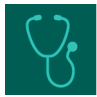

Supplementary Materials

|                                                                                                                                                                                            |             |                                                                                                                                                                                                                                                                                                                                                                                                                                                                                                                                                                                                                                                                                                   |
|--------------------------------------------------------------------------------------------------------------------------------------------------------------------------------------------|-------------|---------------------------------------------------------------------------------------------------------------------------------------------------------------------------------------------------------------------------------------------------------------------------------------------------------------------------------------------------------------------------------------------------------------------------------------------------------------------------------------------------------------------------------------------------------------------------------------------------------------------------------------------------------------------------------------------------|
| <b>PubMed (NCBI)</b>                                                                                                                                                                       | 537 Records | <p>((("coronavirus"[MeSH Terms] OR "Coronavirus Infections"[mesh] OR coronavirus[tiab]) AND (novel[tiab] OR wuhan[tiab] OR china[tiab] OR 2019[tiab])) OR</p> <p>"COVID-19"[Mesh] OR "SARS-CoV-2"[Mesh] OR "COVID-19 Testing"[Mesh] OR "COVID-19 Vaccines"[Mesh] OR covid[tiab] covid19[tiab] OR covid2019[tiab] OR 2019nCoV[tiab] OR SARS-CoV-2[tiab] OR SARSCoV2[tiab] OR SARSCoV-2[tiab] OR SARS-CoV2[tiab] OR HCov2[tiab] OR 2019ncov[tiab] OR 2019-ncov[tiab])</p> <p>AND</p> <p>("Tuberculosis"[Mesh] OR "Mycobacterium tuberculosis"[Mesh] OR "BCG vaccine"[mesh] OR tuberculosis[tiab] OR tubercular[tiab] OR tb[tiab] OR mdrtb[tiab] OR xdrtb[tiab] OR bcg[tiab] OR calmette*[tiab])</p> |
| <b>Embase (Elsevier)</b>                                                                                                                                                                   | 897 Records | <p>('coronavirus disease 2019'/de OR 'severe acute respiratory syndrome coronavirus 2'/de OR (coronavirus NEAR/3 (novel OR wuhan OR china OR 2019)):ab,ti,kw OR '2019-nCoV':ab,ti,kw OR 2019nCoV:ab,ti,kw OR COVID:ab,ti,kw OR COVID19:ab,ti,kw OR COVID2019:ab,ti,kw OR 'SARS-CoV-2':ab,ti,kw OR SARSCoV2:ab,ti,kw OR 'SARSCoV-2':ab,ti,kw OR 'SARS-CoV2':ab,ti,kw OR HCov2:ab,ti,kw OR '2019 ncov':ab,ti,kw OR 2019ncov:ab,ti,kw)</p> <p>AND</p> <p>('tuberculosis'/exp OR 'Mycobacterium tuberculosis'/exp OR 'BCG vaccine'/exp OR tuberculosis:ab,ti,kw OR tb:ab,ti,kw OR mdrtb:ab,ti,kw OR xdrtb:ab,ti,kw OR bcg:ab,ti,kw OR calmette*:ab,ti,kw)</p>                                         |
| <b>WHO Global Literature on<br/>Coronavirus Disease</b>                                                                                                                                    | 847 Records | tuberculosis OR tb OR mdrtb OR xdrtb OR bcg                                                                                                                                                                                                                                                                                                                                                                                                                                                                                                                                                                                                                                                       |
| <b>Web of Science Core<br/>Collection (Clarivate)</b><br>Indexes=SCI-EXPANDED,<br>SSCI, A&HCI, CPCI-S,<br>CPCI-SSH, BKCI-S, BKCI-<br>SSH, ESCI, CCR-<br>EXPANDED, IC<br>Timespan=All years | 491 Records | <p>TS=((("coronavirus" NEAR/3 ("novel" OR "wuhan" OR "china" OR "2019")) OR "2019-nCoV" OR "2019nCoV" OR "COVID" OR "COVID19" OR "COVID2019" OR "SARS-CoV-2" OR "SARSCoV2" OR "SARSCoV-2" OR "SARS-CoV2" OR "HCov2" OR "2019 ncov" OR "2019ncov")</p> <p>AND</p> <p>TS=("tuberculosis" OR "tb" OR "mdrtb" OR "xdrtb" OR "bcg" OR "calmette*")</p>                                                                                                                                                                                                                                                                                                                                                 |

**Scheme S1.** Search strategy to identify manuscripts regarding clinical outcomes of individuals with COVID-19 and tuberculosis.

**Table S1.** Biases and/or methodological issues of all included studies.

| <b>Study No.<br/>(Reference<br/>No.)</b> | <b>First author<br/>(Publication date)</b> | <b>Location</b>               | <b>Bias/Methodological issue</b>                                                         |
|------------------------------------------|--------------------------------------------|-------------------------------|------------------------------------------------------------------------------------------|
| 1 [14]                                   | Boulle<br>(August 2020)                    | Western Cape,<br>South Africa | Selection bias                                                                           |
| 2 [15]                                   | Pillay-van Wyk<br>(October 2020)           | South Africa                  | Reporting bias                                                                           |
| 3 [16]                                   | Torun<br>(October 2020)                    | Turkey                        | Misclassification bias, Select patient cohort (healthcare workers)                       |
| 4 [17]                                   | Sun<br>(April 2020)                        | Beijing, China                | Selection bias                                                                           |
| 5 [18]                                   | van der Zalm<br>(June 2021)                | Cape Town, South<br>Africa    | Selection bias, Select patient cohort (children)                                         |
| 6 [19]                                   | Sy<br>(July 2020)                          | Philippines                   | Reporting bias, Misclassification bias                                                   |
| 7 [20]                                   | Jassat<br>(December 2020)                  | South Africa                  | Selection bias, Representative bias, Misclassification bias                              |
| 8 [21]                                   | Gajbhiye<br>(February 2021)                | Mumbai, India                 | Selection bias, Small sample size, Select patient cohort (pregnant and postpartum women) |
| 9 [22]                                   | Gupta<br>(October 2020)                    | New Delhi, India              | Selection bias, Small sample size                                                        |
| 10 [23]                                  | Fisman<br>(September 2020)                 | Ontario, Canada               | Misclassification bias, Reporting bias                                                   |
| 11 [24]                                  | Demkina<br>(November 2020)                 | Russia                        | Misclassification bias, Selection bias                                                   |
| 12 [25]                                  | Kuwari<br>(July 2020)                      | Qatar                         | Misclassification bias, Reporting bias                                                   |
| 13 [26]                                  | Meizhu Chen<br>(April 2020)                | Zhuhai, China                 | Selection bias                                                                           |
| 14 [27]                                  | Lei<br>(March 2020)                        | Daofu, Sichuan, China         | Selection bias, Small sample size                                                        |
| 15 [28]                                  | Yu Chen<br>(March 2020)                    | Shenyang, China               | Selection bias, Small sample size                                                        |
| 16 [29]                                  | Hongyan Zhang<br>(September 2020)          | Wuhan, Hubei, China           | Misclassification bias, Selection bias, Select patient cohort (cancer patients)          |
| 17 [30]                                  | Huizheng Zhang<br>(March 2020)             | Chongqing, China              | Misclassification bias, Selection bias, Small sample size                                |
| 18 [31]                                  | Bi<br>(May 2020)                           | Shenzhen, China               | Selection bias                                                                           |

All of them had some element of confound bias.
